# Supplementary material
Source: PubMed Central journal article supplement (PMC3984314)
Supplement: cc-13-910-s04.pdf [file cc-13-910-s04.pdf]

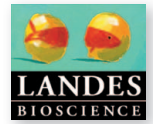

## **Supplemental Material to:**

**Galina B Belostotskaya and Tatyana A Golovanova**

**Characterization of contracting cardiomyocyte colonies  
in the primary culture of neonatal rat myocardial cells: A  
model of in vitro cardiomyogenesis**

**Cell Cycle 2014; 13(6)**

**<http://dx.doi.org/10.4161/cc.27768>**

**<http://www.landesbioscience.com/journals/cc/article/27768>**

**VIDEO S1.** The confluent monolayer of contracting myocytes resulting from cell plating at a density of  $5 \times 10^4$  cells/cm<sup>2</sup> (contraction rate: 28 beats/min, DIV 11).

**VIDEO S2.** The contraction of individual mature cardiomyocytes (density of cell plating:  $2 \times 10^4$  cells/cm<sup>2</sup>, contraction rate: 47 beats/min, DIV 3)

**VIDEO S3.** Contracting cardiomyocyte colony in the culture (density of cell plating:  $2 \times 10^4$  cells/cm<sup>2</sup>, contraction rate: 10 beats/min, DIV 11).

**VIDEO S4.** Progressive increase in the contraction rate of the same colony during cultivation. The contraction rate on the 18<sup>th</sup> DIV: 25 beats/min.

**VIDEO S5.** Progressive increase in the contraction rate of the same colony during cultivation. The contraction rate on the 25<sup>th</sup> DIV: 46 beats/min.

**VIDEO S6.** Progressive increase in the contraction rate of the same colony during cultivation. The contraction rate on the 30<sup>th</sup> DIV: 58 beats/min.
